# Supplementary material
Source: PubMed Central journal article supplement (PMC7386857)
Supplement: NIHMS1603102-supplement-eFigure_1__eFigure_2___eFigure_3__eFigure_4.pdf [file NIHMS1603102-supplement-eFigure_1__eFigure_2___eFigure_3__eFigure_4.pdf]

# Supplemental Digital Content

**eFigure 1:** Trends in age-adjusted incidence rates for female breast cancer by American Indian and Alaska Native (AI/AN) and non-Hispanic White (NHW) race, United States, 1999-2015.

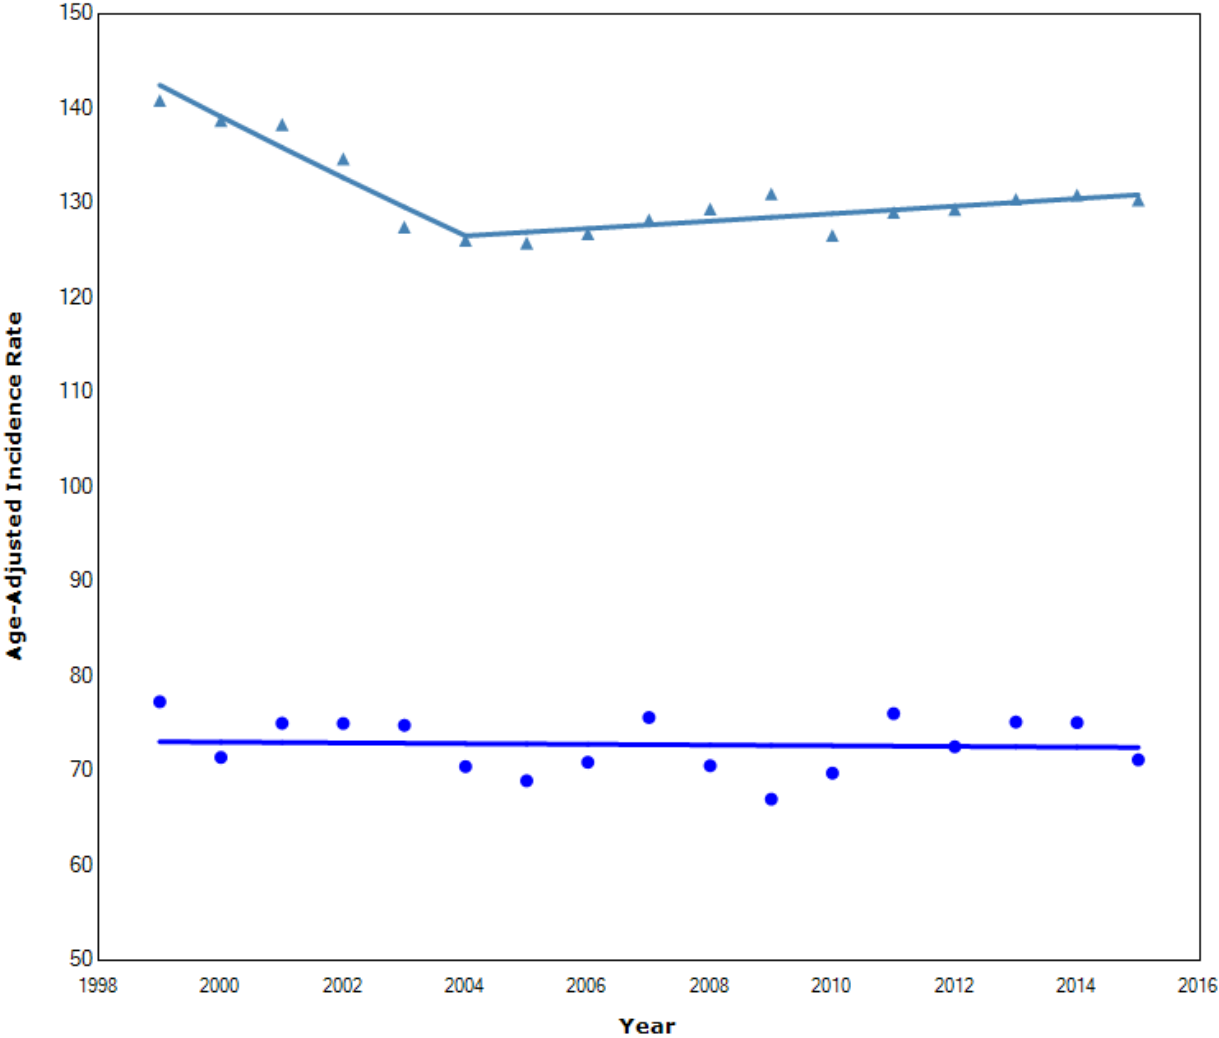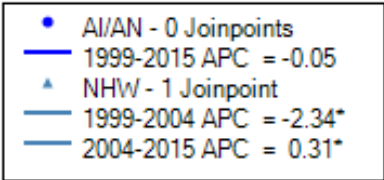

**Note:** Incidence rates are per 100,000 women.  
 \*Annual percent change has significantly increased or decreased.

**eFigure 2:** Trends in age-adjusted incidence rates for prostate cancer by American Indian and Alaska Native (AI/AN) and non-Hispanic White (NHW) race, United States, 1999-2015.

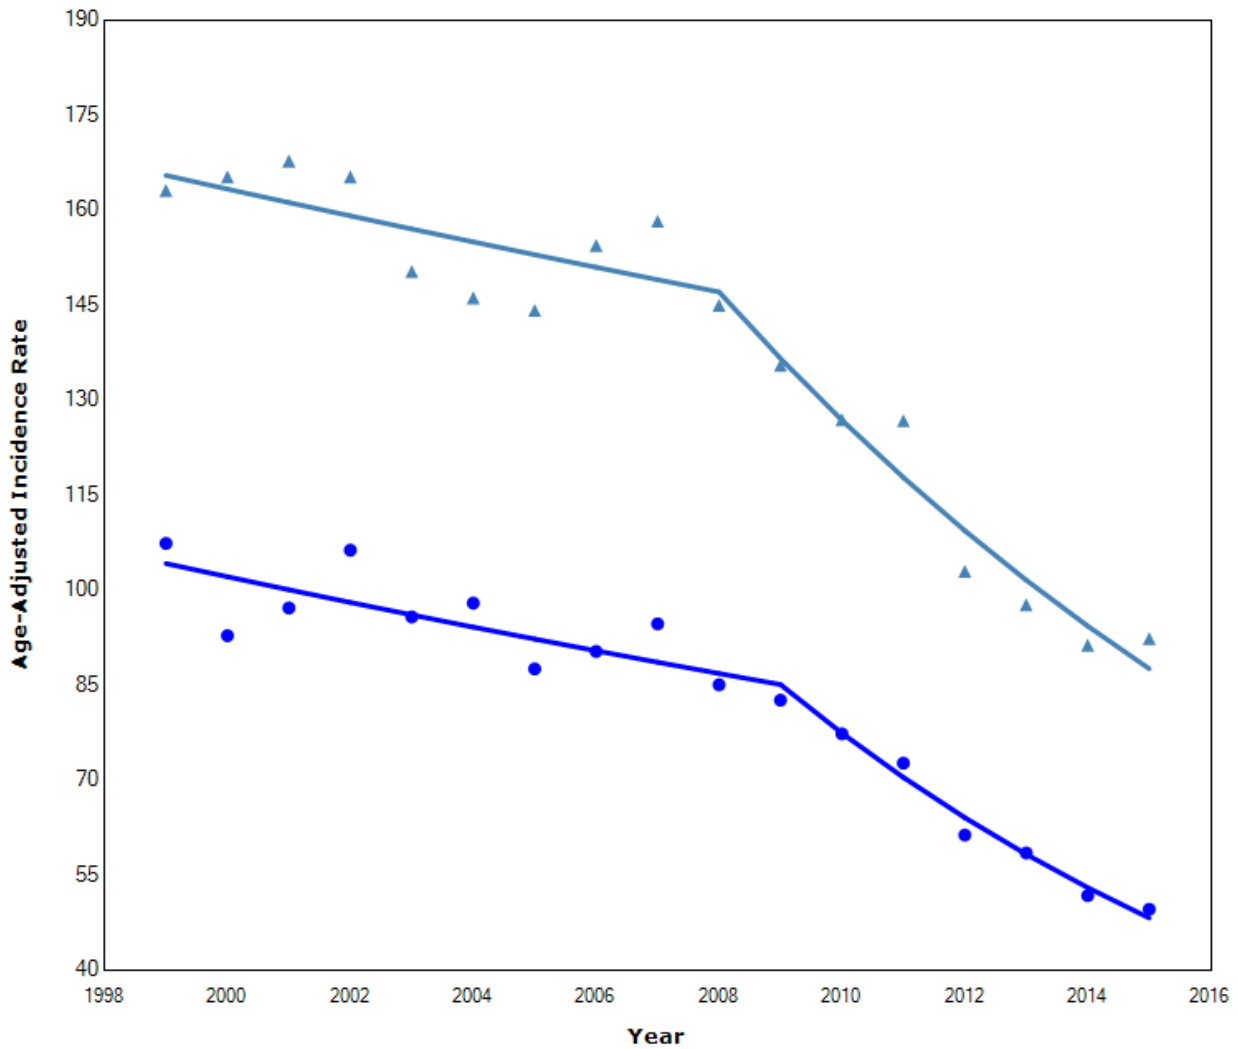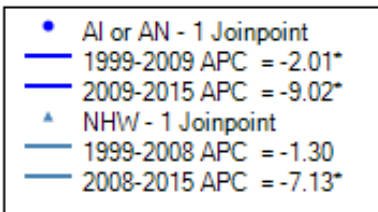

**Note:** Incidence rates are per 100,000 men.

\*Annual percent change has significantly increased or decreased.

**eFigure 3:** Trends in age-adjusted incidence rates for lung and bronchus cancer by American Indian and Alaska Native (AI/AN) and non-Hispanic White (NHW) race, United States, 1999-2015.

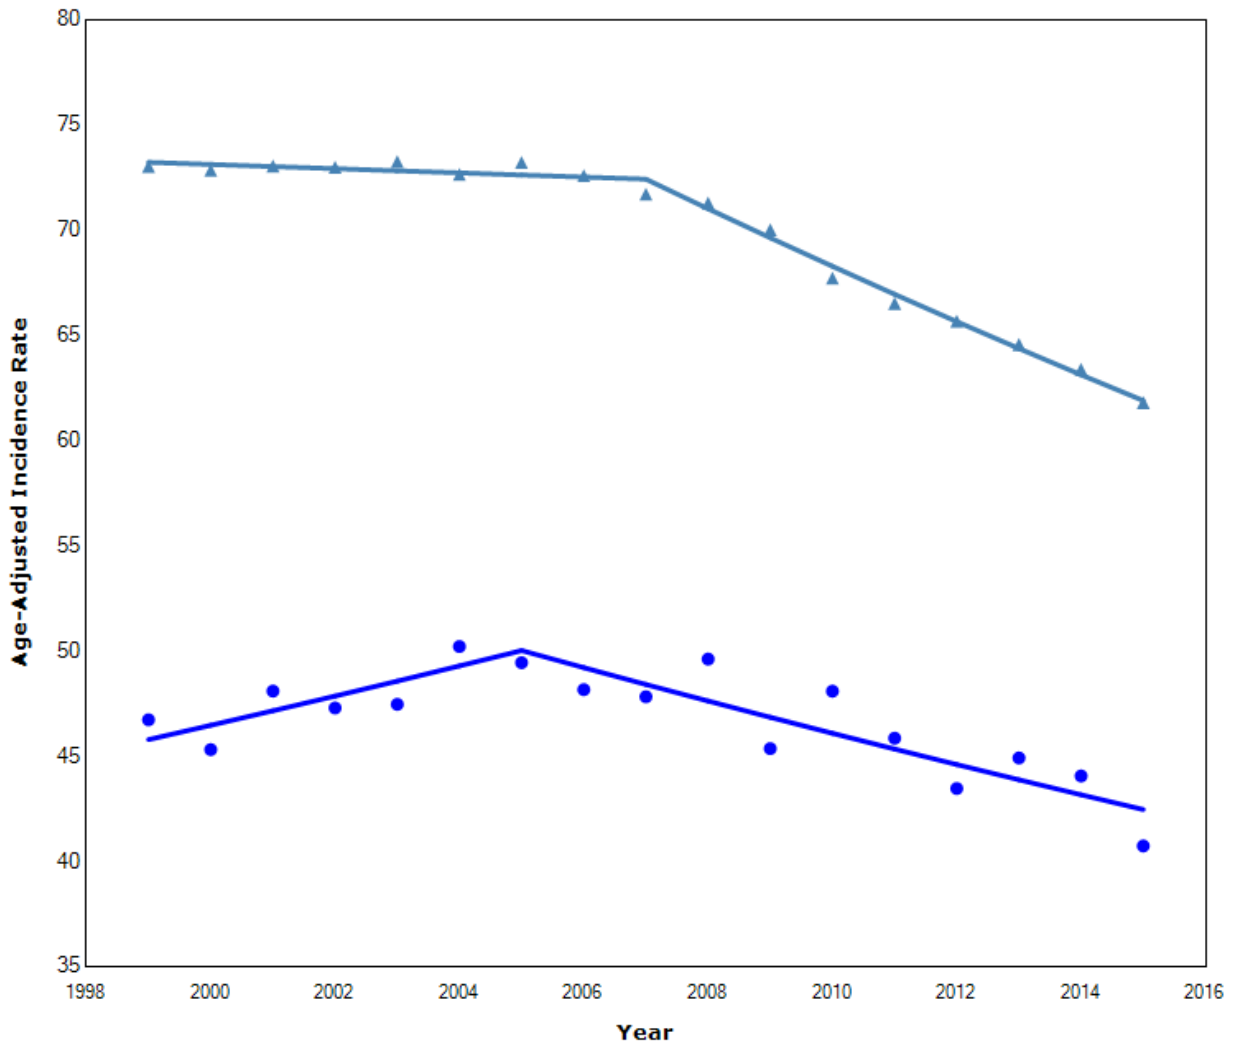

● AI or AN - 1 Joinpoint  
 — 1999-2005 APC = 1.48  
 — 2005-2015 APC = -1.62\*  
 ▲ NHW - 1 Joinpoint  
 — 1999-2007 APC = -0.14  
 — 2007-2015 APC = -1.94\*

**Note:** Incidence rates are per 100,000 persons.  
 \*Annual percent change has significantly increased or decreased.

**eFigure 4:** Trends in age-adjusted incidence rates for colon and rectum cancer by American Indian and Alaska Native (AI/AN) and non-Hispanic White (NHW) race, United States, 1999-2015.

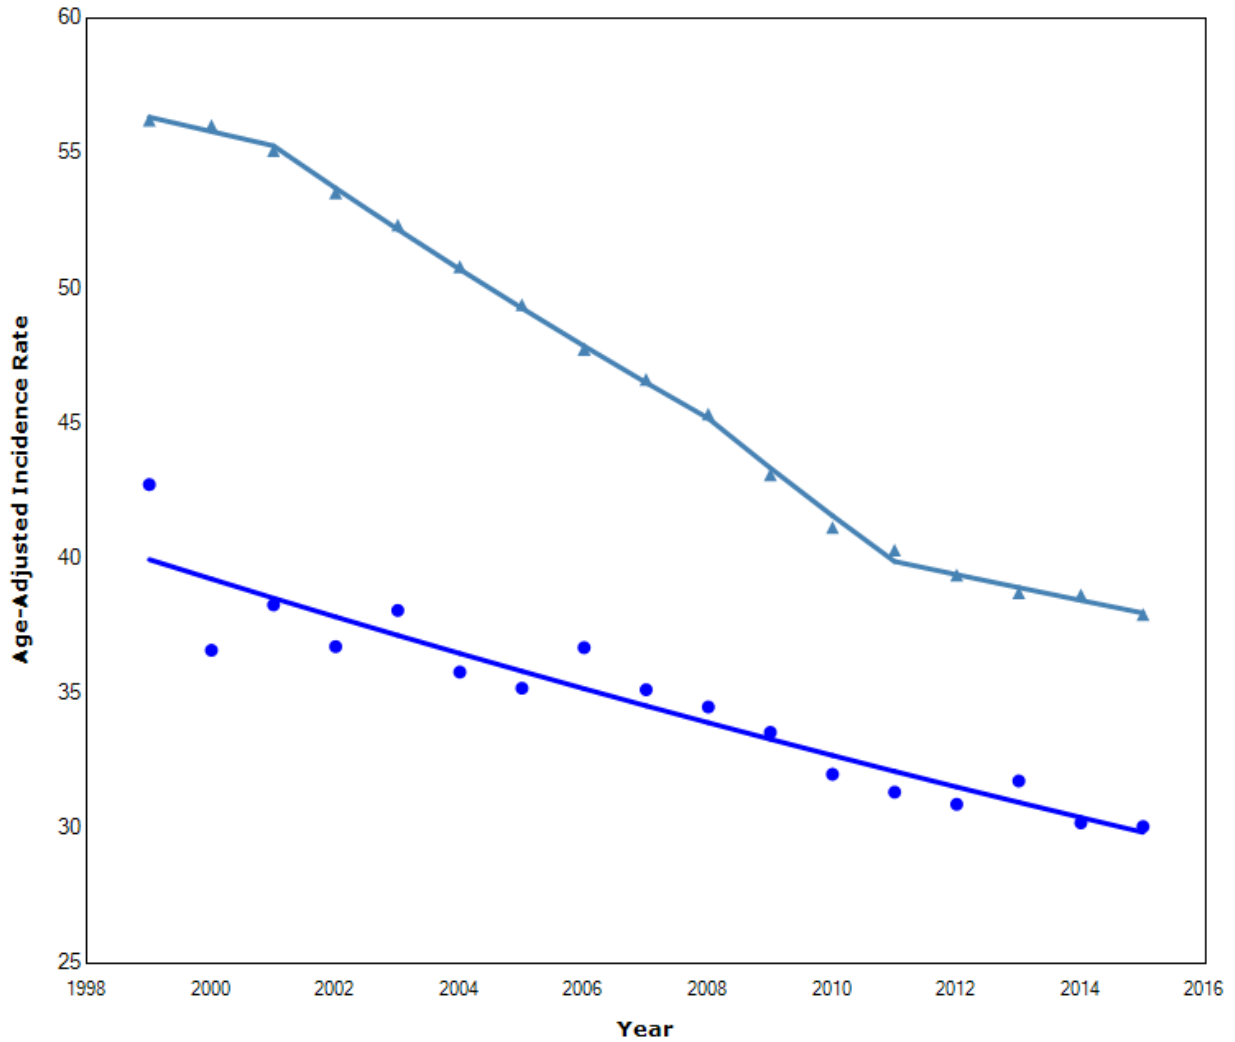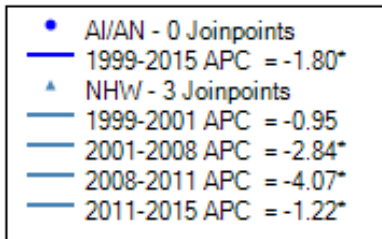

**Note:** Incidence rates are per 100,000 persons.

\*Annual percent change has significantly increased or decreased.
